# Supplementary material for: Molecular dissection of RbpA-mediated regulation of fidaxomicin sensitivity in mycobacteria
Source: PubMed Central journal article supplement (PMC8956947; doi:10.1016/j.jbc.2022.101752), 2022-02-19

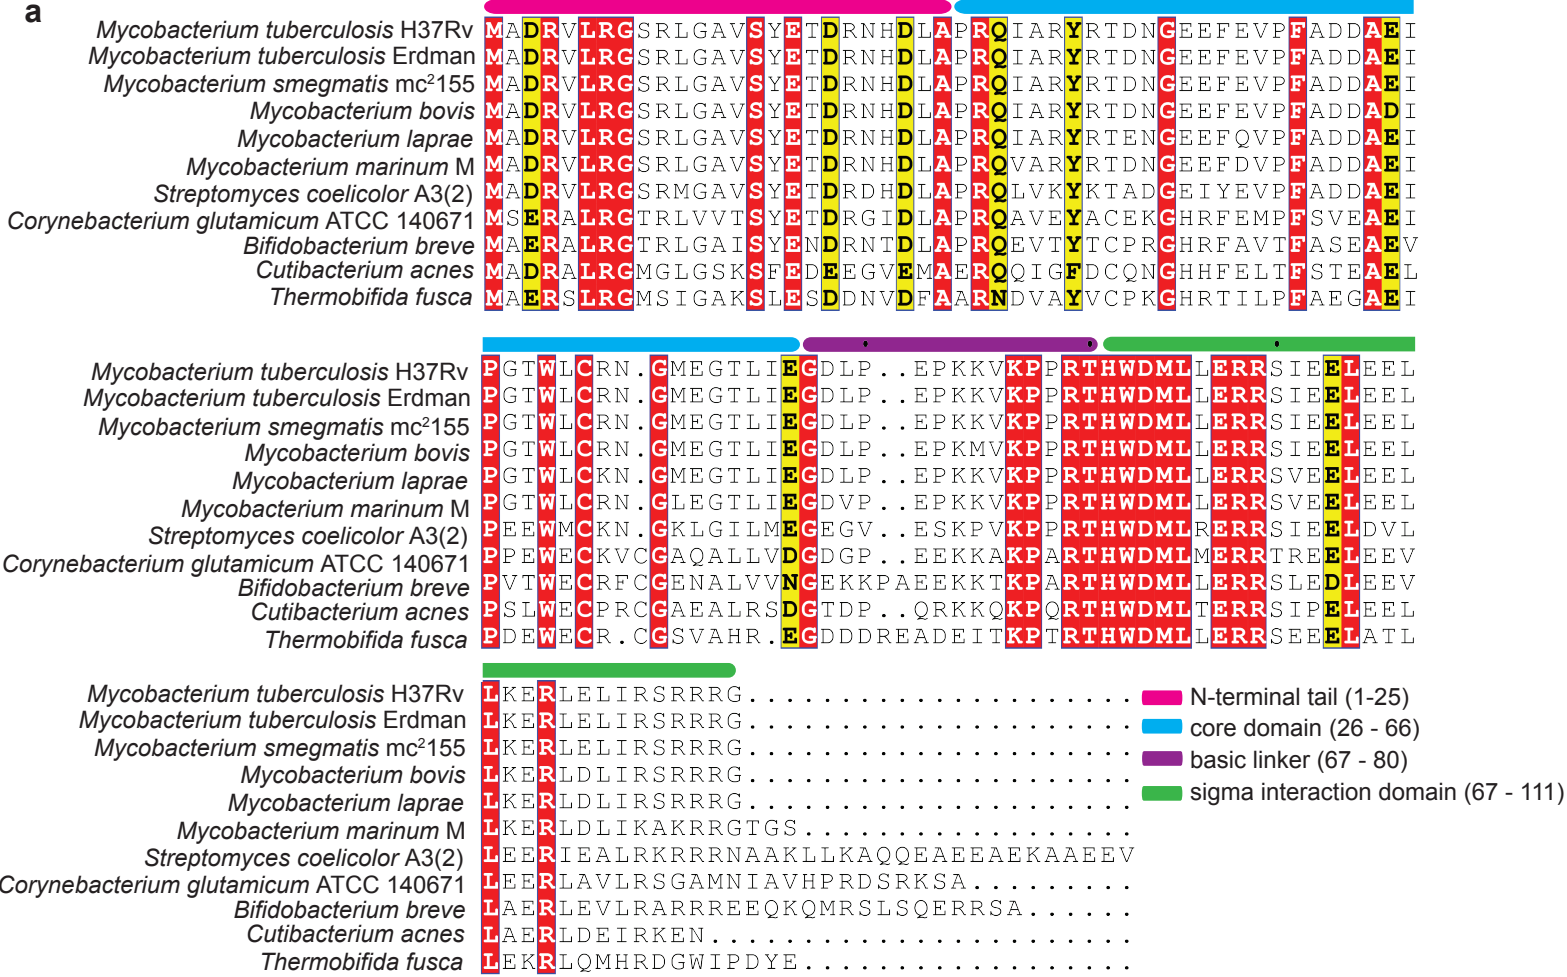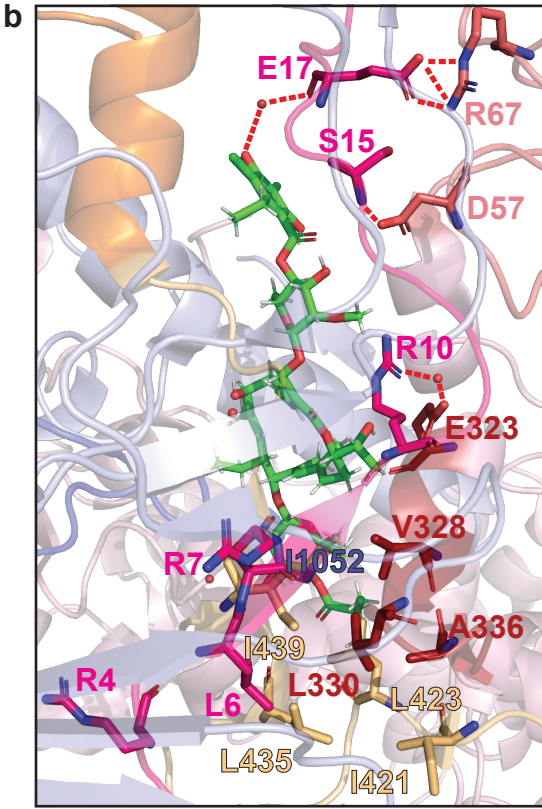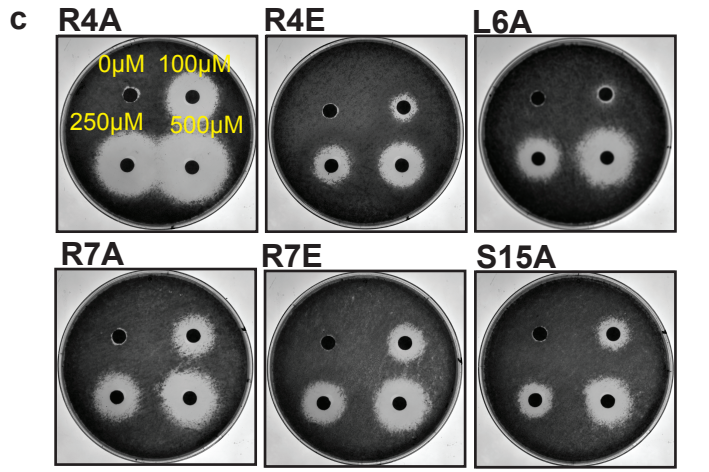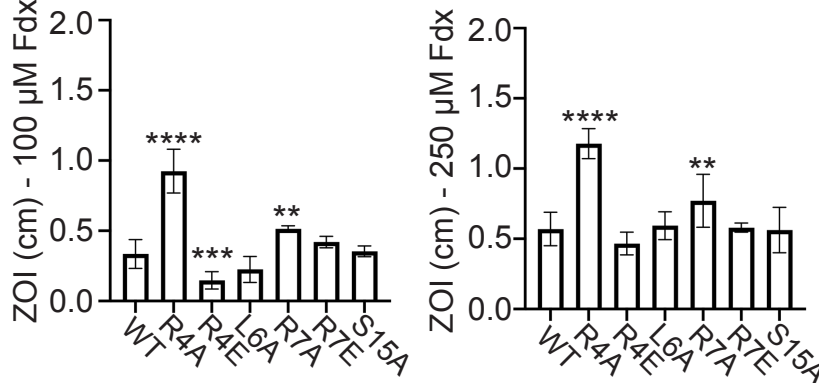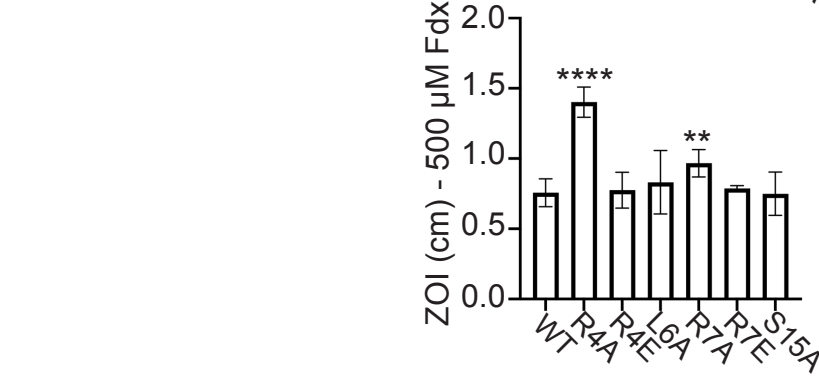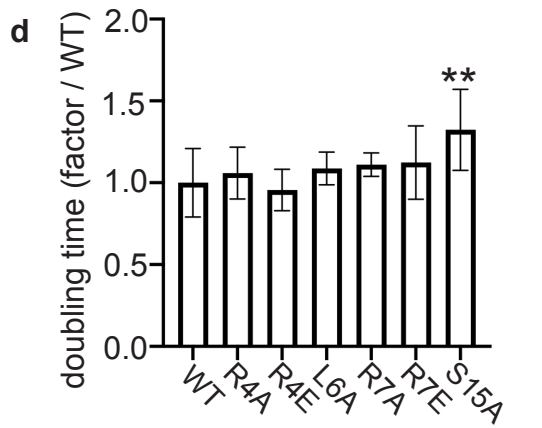

Supplement: mmc3.pdf [file mmc3.pdf]
